# Supplementary material
Source: Elsevier journal article supplement (https://www.sciencedirect.com/science/article/pii/S0300893225015660)
Supplement: mmc1 [file mmc1.pdf]

## Supplementary data

**Table S1.** Association of urban green space coverage with the risk of CVD incidence and CVD mortality in a sensitivity analysis including various exposure data

|                               | Urban green space coverage |                  |                  |                        | <i>P</i> for trend |
|-------------------------------|----------------------------|------------------|------------------|------------------------|--------------------|
|                               | First quartile (low)       | Second quartile  | Third quartile   | Fourth quartile (high) |                    |
| <b>2011</b>                   |                            |                  |                  |                        |                    |
| <i>Number of people</i>       | 20 769                     | 21 057           | 21 741           | 21 172                 |                    |
| <i>Cardiovascular disease</i> |                            |                  |                  |                        |                    |
| Events                        | 1311                       | 1036             | 990              | 1002                   |                    |
| aHR <sup>a</sup>              | 1.00 (Reference)           | 0.83 (0.77-0.90) | 0.76 (0.70-0.83) | 0.85 (0.79-0.93)       | < .001             |
| aHR <sup>b</sup>              | 1.00 (Reference)           | 0.83 (0.76-0.90) | 0.76 (0.70-0.82) | 0.84 (0.77-0.91)       | < .001             |
| <i>CVD mortality</i>          |                            |                  |                  |                        |                    |
| Events                        | 135                        | 77               | 115              | 75                     |                    |
| aHR <sup>a</sup>              | 1.00 (Reference)           | 0.63 (0.48-0.84) | 0.90 (0.70-1.15) | 0.67 (0.50-0.89)       | .041               |
| aHR <sup>b</sup>              | 1.00 (Reference)           | 0.63 (0.47-0.83) | 0.89 (0.69-1.14) | 0.66 (0.50-0.88)       | .033               |
| <b>2010-2011</b>              |                            |                  |                  |                        |                    |
| <i>Number of people</i>       | 20 927                     | 20 714           | 20 641           | 20 687                 |                    |
| <i>Cardiovascular disease</i> |                            |                  |                  |                        |                    |
| Events                        | 1307                       | 1039             | 930              | 973                    |                    |
| aHR <sup>a</sup>              | 1.00 (Reference)           | 0.82 (0.76-0.89) | 0.75 (0.69-0.82) | 0.83 (0.77-0.91)       | < .001             |
| aHR <sup>b</sup>              | 1.00 (Reference)           | 0.83 (0.77-0.90) | 0.75 (0.69-0.81) | 0.83 (0.77-0.91)       | < .001             |
| <i>CVD mortality</i>          |                            |                  |                  |                        |                    |
| Events                        | 128                        | 93               | 99               | 71                     |                    |
| aHR <sup>a</sup>              | 1.00 (Reference)           | 0.77 (0.59-1.01) | 0.84 (0.65-1.10) | 0.66 (0.49-0.88)       | .012               |
| aHR <sup>b</sup>              | 1.00 (Reference)           | 0.78 (0.60-1.02) | 0.84 (0.65-1.10) | 0.67 (0.50-0.90)       | .014               |

CVD, cardiovascular disease; N, number of people; aHR, adjusted hazard ratio; CI, confidence interval.

Counts are presented as number. Hazard ratios are shown as aHR with 95% confidence intervals.

Urban green space coverage was defined as the area of parks and artificially designed green space divided by the area of residential districts.

Adjusted hazard ratio calculated by Cox proportional hazards regression analysis.

<sup>a</sup>Model 1 adjusted for age, sex, household income and Charlson comorbidity index.

<sup>b</sup>Model 2 adjusted for age, sex, household income, Charlson comorbidity index, body mass index, systolic blood pressure, triglycerides, low-density lipoprotein cholesterol, fasting serum glucose, smoking status, physical activity, and alcohol consumption.

**Table S2.** Descriptive characteristics of physical activity by sex

| Urban green space coverage               | Men                  |                 |                |                        | Women                |                 |                |                        |
|------------------------------------------|----------------------|-----------------|----------------|------------------------|----------------------|-----------------|----------------|------------------------|
|                                          | First quartile (low) | Second quartile | Third quartile | Fourth quartile (high) | First quartile (low) | Second quartile | Third quartile | Fourth quartile (high) |
| Number of people                         | 8871                 | 9552            | 8497           | 9966                   | 9277                 | 10 181          | 9198           | 9383                   |
| <i>Physical activity, times per week</i> |                      |                 |                |                        |                      |                 |                |                        |
| None                                     | 3641 (41.04)         | 3871 (40.53)    | 3410 (40.13)   | 3799 (38.12)           | 4816 (51.91)         | 5353 (52.58)    | 4945 (53.76)   | 4833 (51.51)           |
| 1-2                                      | 1800 (20.29)         | 2080 (21.78)    | 1868 (21.98)   | 2192 (21.99)           | 1476 (15.91)         | 1676 (16.46)    | 1573 (17.10)   | 1590 (16.95)           |
| 3-4                                      | 1348 (15.20)         | 1472 (15.41)    | 1330 (15.65)   | 1663 (16.69)           | 1156 (12.46)         | 1343 (13.19)    | 1073 (11.67)   | 1223 (13.03)           |
| 5-6                                      | 958 (10.80)          | 979 (10.25)     | 914 (10.76)    | 1071 (10.75)           | 810 (8.73)           | 895 (8.79)      | 820 (8.91)     | 795 (8.47)             |
| 7                                        | 1124 (12.67)         | 1150 (12.04)    | 975 (11.47)    | 1241 (12.45)           | 1019 (10.98)         | 914 (8.98)      | 787 (8.56)     | 942 (10.04)            |

The data are presented as No. (%).

Urban green space coverage was defined as the area of parks and artificially designed green space divided by the area of residential districts.

**Table S3.** Association between urban green space coverage and the risk of CVD mortality according to physical activity in women.

| aHR (95% CI)         | N      | Event | Urban green space coverage |                  |                  |                        | P for trend |
|----------------------|--------|-------|----------------------------|------------------|------------------|------------------------|-------------|
|                      |        |       | First quartile (low)       | Second quartile  | Third quartile   | Fourth quartile (high) |             |
| <b>CVD Mortality</b> |        |       |                            |                  |                  |                        |             |
| Women                |        |       |                            |                  |                  |                        |             |
| Physical activity    |        |       |                            |                  |                  |                        |             |
| No                   | 19,947 | 110   | 1.00 (Reference)           | 0.92 (0.53-1.62) | 1.11 (0.64-1.94) | 1.57 (0.93-2.66)       | 0.061       |
| Yes                  | 18,092 | 56    | 1.00 (Reference)           | 0.79 (0.40-1.53) | 0.82 (0.41-1.64) | 0.41 (0.17-0.98)       | 0.063       |

Urban green space coverage was defined as the area of parks and artificially designed green space divided by the area of residential districts.

Hazard ratio calculated by Cox proportional hazards regression analysis after adjustments for age, sex, household income, Charlson comorbidity index, body mass index, systolic blood pressure, triglyceride, low-density lipoprotein cholesterol, fasting serum glucose, smoking status, and alcohol consumption.

Acronyms: N, number of people; aHR, adjusted hazard ratio; CI, confidence interval; CCI, Charlson comorbidity index; BMI; body mass index; SBP, systolic blood pressure; LDL, low density lipoprotein; FSG, fasting serum glucose.
